# Supplementary material for: Novofumigatonin biosynthesis involves a non-heme iron-dependent endoperoxide isomerase for orthoester formation
Source: PubMed Central journal article supplement (PMC6030086; doi:10.1038/s41467-018-04983-2), 2018-07-03
Supplement: 41467_2018_4983_MOESM3_ESM.pdf [file 41467_2018_4983_MOESM3_ESM.pdf]

## **Description of Additional Supplementary Files**

File Name: Supplementary Data 1

Description: Primers used in this study.

File Name: Supplementary Data 2

Description: Plasmids constructed in this study.
